# Supplementary material for: Self-reduction of gold@platinum bimetallic nanoparticles on Ti3C2Tx MXene nanoribbons coupled with hydrogel and smartphone technology for colorimetric detection of silver ions
Source: Royal Society of Chemistry journal article supplement (doi:10.1039/d4ay01907e), 2024-12-06
Supplement: d4ay01907e1.pdf [file d4ay01907e1.pdf]

## Supporting information

### **Self-reduction gold@platinum bimetallic nanoparticles on $Ti_3C_2T_x$ MXene nanoribbons coupled with hydrogel and smartphone for colorimetric detection of silver ions**

Jing Li,<sup>a#</sup> Xun Zhou,<sup>a#</sup> Guanghua Mao,<sup>a</sup> Gangbing Zhu,<sup>a</sup> and Yinhui Yi<sup>a,b\*</sup>

<sup>a</sup> School of the Environment and Safety Engineering, and Collaborative Innovation Center of Technology and Material of Water Treatment, Jiangsu University, Zhenjiang, 212013, P. R. China

<sup>b</sup> State Environmental Protection Key Laboratory of Monitoring for Heavy Metal Pollutants, P.R. China

---

# Co-first authors.

\* Corresponding author.

E-mail address: yyh1108@ujs.edu.cn.

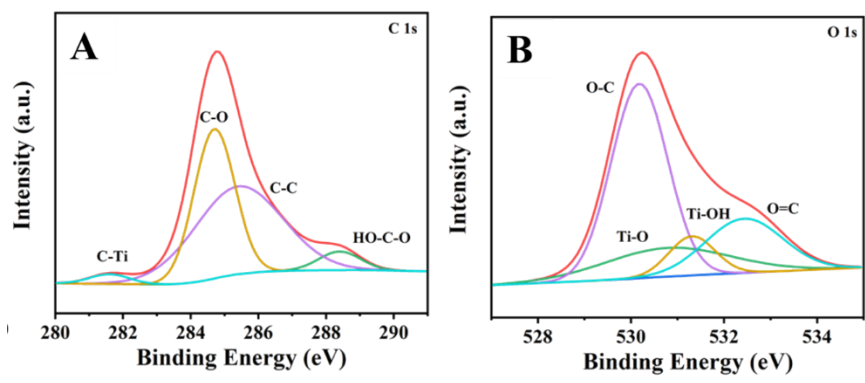

**Figure S1.** High-resolution spectra of C 1s (A) and O 1s (B).

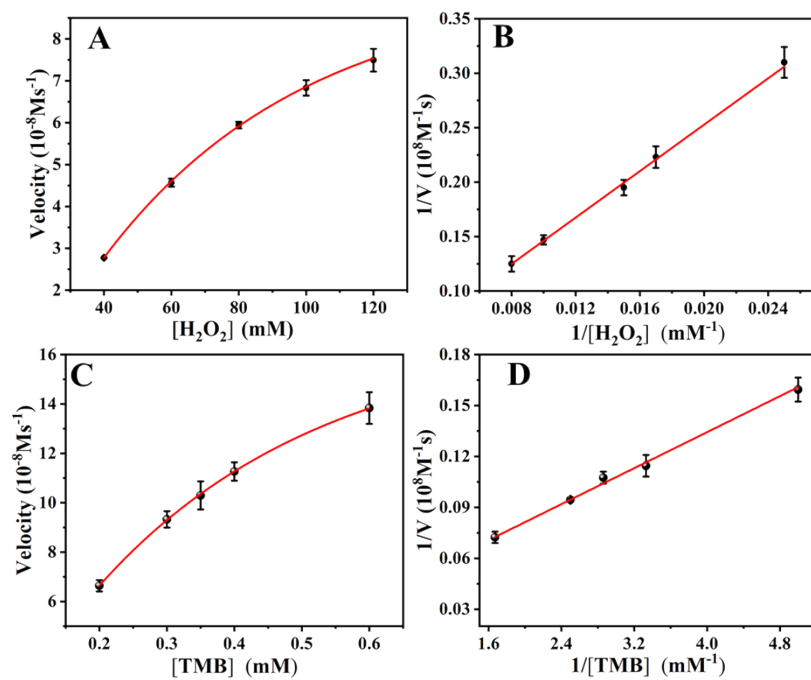

**Figure S2.** Steady-state kinetic analysis of Au@Pt-Ti<sub>3</sub>C<sub>2</sub>T<sub>x</sub>NR with H<sub>2</sub>O<sub>2</sub> (A) and TMB (C) as substrates, respectively. The corresponding Lineweaver-Burk plots of (B) and (D).

**Table S1.** Comparison of the kinetic parameters of HRP and other nanozymes.

| Materials                                                                     | Substrate                     | K <sub>m</sub> (mM) | Ref       |
|-------------------------------------------------------------------------------|-------------------------------|---------------------|-----------|
| HRP                                                                           | TMB                           | 0.43                | 1         |
|                                                                               | H <sub>2</sub> O <sub>2</sub> | 3.7                 |           |
| g-C <sub>3</sub> N <sub>4</sub> /PdNPs/<br>Fe <sub>3</sub> O <sub>4</sub> NPs | TMB                           | 1.05                | 2         |
|                                                                               | H <sub>2</sub> O <sub>2</sub> | 7.71                |           |
| FeN <sub>4</sub> -SA                                                          | TMB                           | 0.78                | 3         |
|                                                                               | H <sub>2</sub> O <sub>2</sub> | 43.3                |           |
| Fe-MOF                                                                        | TMB                           | 2.60                | 4         |
|                                                                               | H <sub>2</sub> O <sub>2</sub> | 1.30                |           |
| Au@Pt-                                                                        | TMB                           | 0.41                | This work |
| Ti <sub>3</sub> C <sub>2</sub> T <sub>x</sub> NR                              | H <sub>2</sub> O <sub>2</sub> | 0.31                |           |

In order to further study the peroxide-like activity of Au@Pt-Ti<sub>3</sub>C<sub>2</sub>T<sub>x</sub>NR, TMB and H<sub>2</sub>O<sub>2</sub> were used as substrates to study and analyze the steady-state kinetics, and the obtained results were compared with those by using horse radish peroxidase (HRP) (Figure S2 and Table S1). Under the optimal reaction conditions, Michaelis-Menten curve was drawn by changing the concentration of TMB and H<sub>2</sub>O<sub>2</sub>, and the corresponding Lineweaver-Burk double reciprocal curve was obtained. The Michaelis constant (K<sub>m</sub>) and the maximum reaction rate (K<sub>max</sub>) were obtained by fitting calculation. Among them, K<sub>m</sub> is considered to be an indicator of the affinity between enzyme and substrate, and the smaller the value, the stronger the affinity between enzyme and substrate, and vice versa. Table S1 shows that Au@Pt-Ti<sub>3</sub>C<sub>2</sub>T<sub>x</sub>NR has superior catalytic activity since its K<sub>m</sub> value on substrate TMB or H<sub>2</sub>O<sub>2</sub> is significantly lower than that of HRP and other nanozymes.

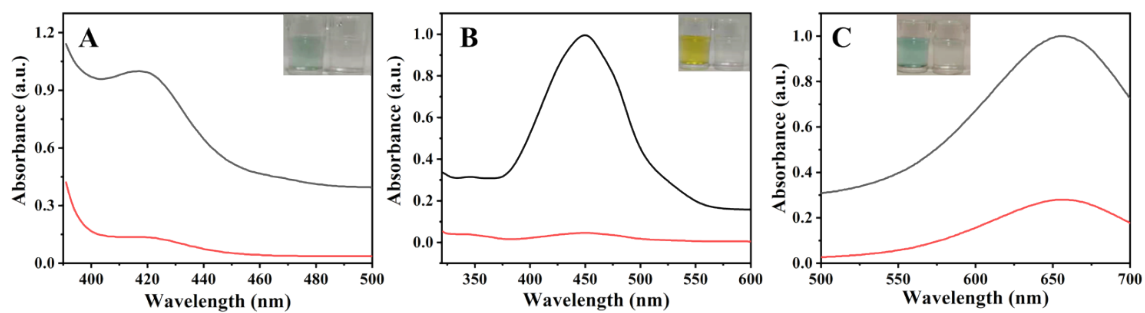

**Figure S3.** Peroxidase-like activity of Au@Pt-Ti<sub>3</sub>C<sub>2</sub>T<sub>x</sub>NR nanozymes. Typical absorption spectra of ABTS (A); OPD (B); TMB (C) oxidation catalyzed by Au@Pt-Ti<sub>3</sub>C<sub>2</sub>T<sub>x</sub>NR nanozymes and controls in the presence of H<sub>2</sub>O<sub>2</sub> in the acetate buffer.

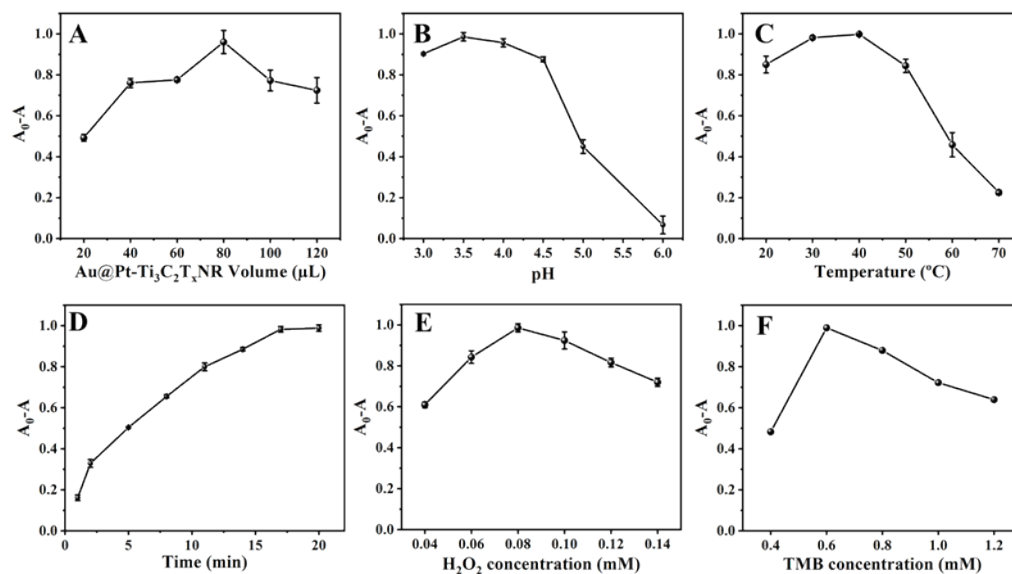

**Figure S4.** Optimization of the Au@Pt-Ti<sub>3</sub>C<sub>2</sub>T<sub>x</sub>NR catalytic activity relative to Au@Pt-Ti<sub>3</sub>C<sub>2</sub>T<sub>x</sub>NR volume (A); pH value (B); temperature (C); time (D); H<sub>2</sub>O<sub>2</sub> concentration (E) and TMB concentration (F).

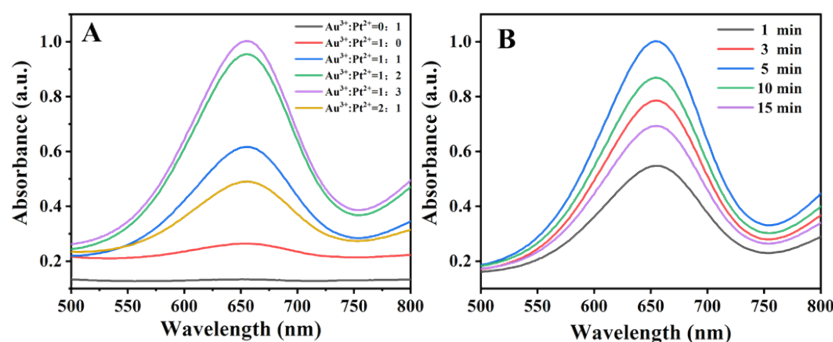

**Figure S5.** (A) The optimization of Au and Pt concentration ratios; (B) The optimization of the reduction reaction time for the preparation of Au@Pt-Ti<sub>3</sub>C<sub>2</sub>T<sub>x</sub>NR.

As for preparing the Au@Pt-Ti<sub>3</sub>C<sub>2</sub>T<sub>x</sub>NR nanozyme, Au@Pt NPs were introduced on the surface of Ti<sub>3</sub>C<sub>2</sub>T<sub>x</sub>NR via a self-reduction approach without the use of any extra reducing agents based on the superior reductibility of Ti<sub>3</sub>C<sub>2</sub>T<sub>x</sub>NR. In order to obtain a better catalytic activity, the ratio of Au<sup>3+</sup>-Pt<sup>2+</sup> and self-reduction time were optimized. As demonstrated in Figure S5A, when Au: Pt = 1:2, the Au@Pt-Ti<sub>3</sub>C<sub>2</sub>T<sub>x</sub>NR exhibits exceptional catalytic activity. Compared with the pure Pt<sup>2+</sup> solution, the introduction of Au<sup>3+</sup> in the precursor mixture can efficiently promote the growth of Pt NPs on Ti<sub>3</sub>C<sub>2</sub>T<sub>x</sub>NR, probably due to the lower reduction potential of Au<sup>3+</sup> than that of Pt<sup>2+</sup>.<sup>5</sup> In light of the catalytic activity of Au@Pt-Ti<sub>3</sub>C<sub>2</sub>T<sub>x</sub>NR toward H<sub>2</sub>O<sub>2</sub>/TMB system, we chose Au@Pt-Ti<sub>3</sub>C<sub>2</sub>T<sub>x</sub>NR (Au: Pt = 1:2) to continue the following experiments. Figure S5B that the Au@Pt-Ti<sub>3</sub>C<sub>2</sub>T<sub>x</sub>NR nanozyme showed the best catalytic activity when the reducing time was 5 min. The catalytic activity displayed a downward trend rather than steady increase as the reducing time was extended during the reducing reaction. In light of this trend, we speculate that it is caused by the formation of larger nanoparticles in conjunction with increasing reducing time,<sup>6</sup> which may have a major effect on the catalytic activity of Au@Pt-Ti<sub>3</sub>C<sub>2</sub>T<sub>x</sub>NR. Based on the above experimental results, we chose concentration ratio of 1:2 for Au<sup>3+</sup>-Pt<sup>2+</sup> and the reduction time of 5 minutes.

## References

1. Gao L, Zhuang J, Nie L, Zhang J, Zhang Y, Gu N, et al. Intrinsic peroxidase-like activity of ferromagnetic nanoparticles. *Nature Nanotechnology*. 2007;2(9):577-83.
2. Zhang X, Sun C, Li R, Jin X, Wu Y, Fu F. Dual-loading of Fe<sub>3</sub>O<sub>4</sub> and Pd nanoparticles on g-C<sub>3</sub>N<sub>4</sub> nanosheets toward a magnetic nanoplatform with enhanced peroxidase-like activity for loading various enzymes for visual detection of small molecules. *Analytical Chemistry*. 2023;95(11):5024-33.
3. Li R, Jiao L, Jia X, Yan L, Li X, Yan D, et al. Bioinspired FeN<sub>5</sub> Sites with Enhanced Peroxidase-like Activity Enable Colorimetric Sensing of Uranyl Ions in Seawater. *Analytical Chemistry*. 2024.
4. Xu W, Jiao L, Yan H, Wu Y, Chen L, Gu W, et al. Glucose oxidase-integrated metal–organic framework hybrids as biomimetic cascade nanozymes for ultrasensitive glucose biosensing. *ACS applied materials & interfaces*. 2019;11(25):22096-101.
5. Yao Y, Lan L, Liu X, Ying Y, Ping J. Spontaneous growth and regulation of noble metal nanoparticles on flexible biomimetic MXene paper for bioelectronics. *Biosensors and Bioelectronics*. 2020;148:111799.
6. Xi X, Wang J, Wang Y, Xiong H, Chen M, Wu Z, et al. Preparation of Au/Pt/Ti<sub>3</sub>C<sub>2</sub>Cl<sub>2</sub> nanoflakes with self-reducing method for colorimetric detection of glutathione and intracellular sensing of hydrogen peroxide. *Carbon*. 2022;197:476-84.
